# Supplementary material for: Steric occlusion regulates proximal interactions of acyl carrier protein domain in fungal fatty acid synthase
Source: PubMed Central journal article supplement (PMC7260205; doi:10.1038/s42003-020-0997-y), 2020-05-29
Supplement: 42003_2020_997_MOESM1_ESM.pdf [file 42003_2020_997_MOESM1_ESM.pdf]

# Supplementary Information for

Steric occlusion regulates proximal interactions of acyl carrier protein domain in  
fungal fatty acid synthase

Jennifer W. Lou<sup>1</sup>, Mohammad T. Mazhab-Jafari<sup>1,2\*</sup>.

<sup>1</sup>Department of Medical Biophysics, University of Toronto, <sup>2</sup>Princess Margaret Cancer Center,  
University Health Network, Toronto, Ontario, Canada.

\* Correspondence: [Mohammad.Mazhab-Jafari@uhnresearch.ca](mailto:Mohammad.Mazhab-Jafari@uhnresearch.ca)

## **This PDF file includes:**

|                               |       |
|-------------------------------|-------|
| Supplementary Figure 1.....   | 2     |
| Supplementary Figure 2.....   | 3-4   |
| Supplementary Figure 3.....   | 5     |
| Supplementary Figure 4.....   | 6     |
| Supplementary Figure 5.....   | 7     |
| Supplementary Figure 6.....   | 8     |
| Supplementary Figure 7.....   | 9     |
| Supplementary Figure 8.....   | 10    |
| Supplementary Figure 9.....   | 11-12 |
| Supplementary Table 1.....    | 13    |
| Supplementary Table 2.....    | 14    |
| Supplementary Table 3.....    | 15    |
| Supplementary References..... | 16    |

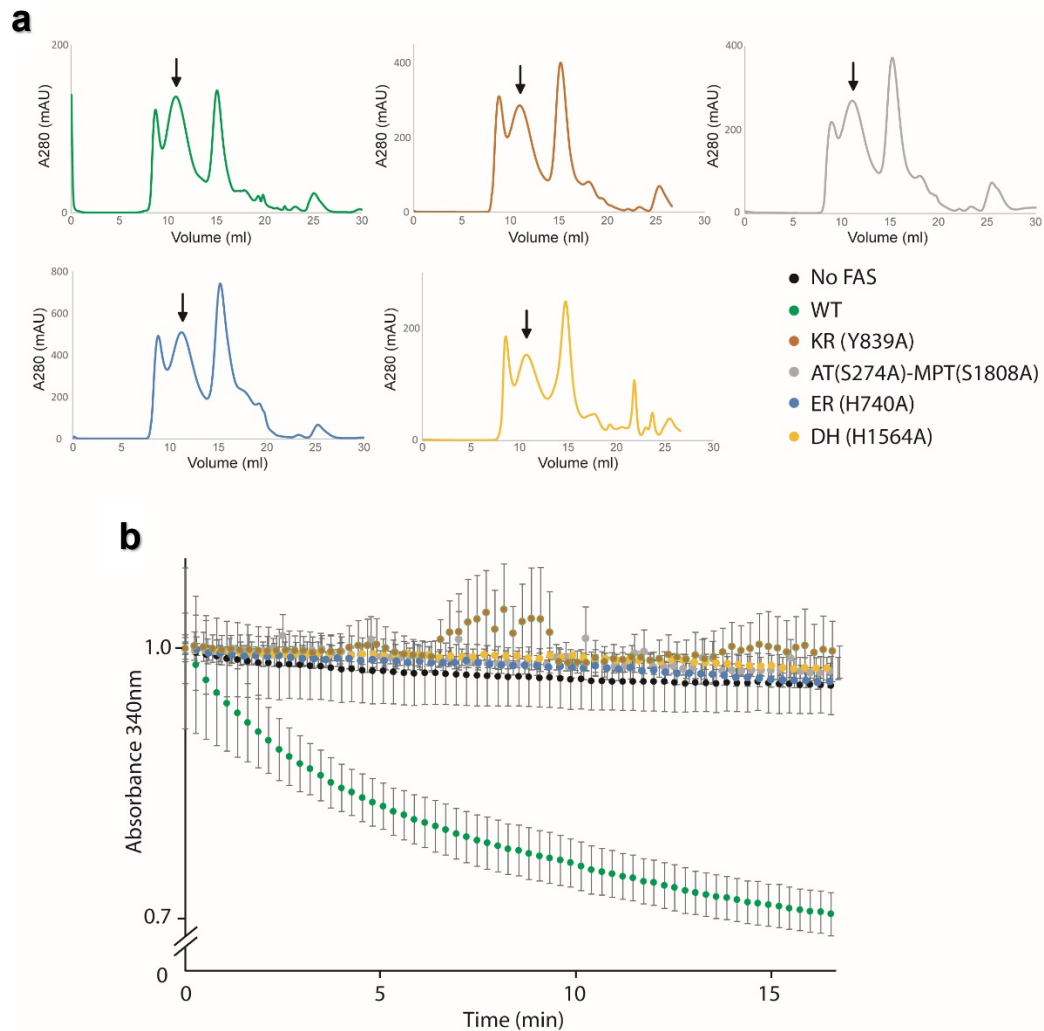

**Supplementary Figure 1. Purification and functional assay of recombinant FAS WT and mutants. a)** size exclusion chromatographs (Superose 6 increase) of WT and mutant FAS complexes expressed in *E. coli*. Peaks corresponding to fully assembled FAS are shown with arrows. **b)** functional assay of purified FAS. Color coding same as in panel A. WT FAS activity assay is performed with three independent protein preparations, each with a technical duplicate. For mutant FAS, the error bars represent data from one protein preparation per mutant, with a technical triplicate.

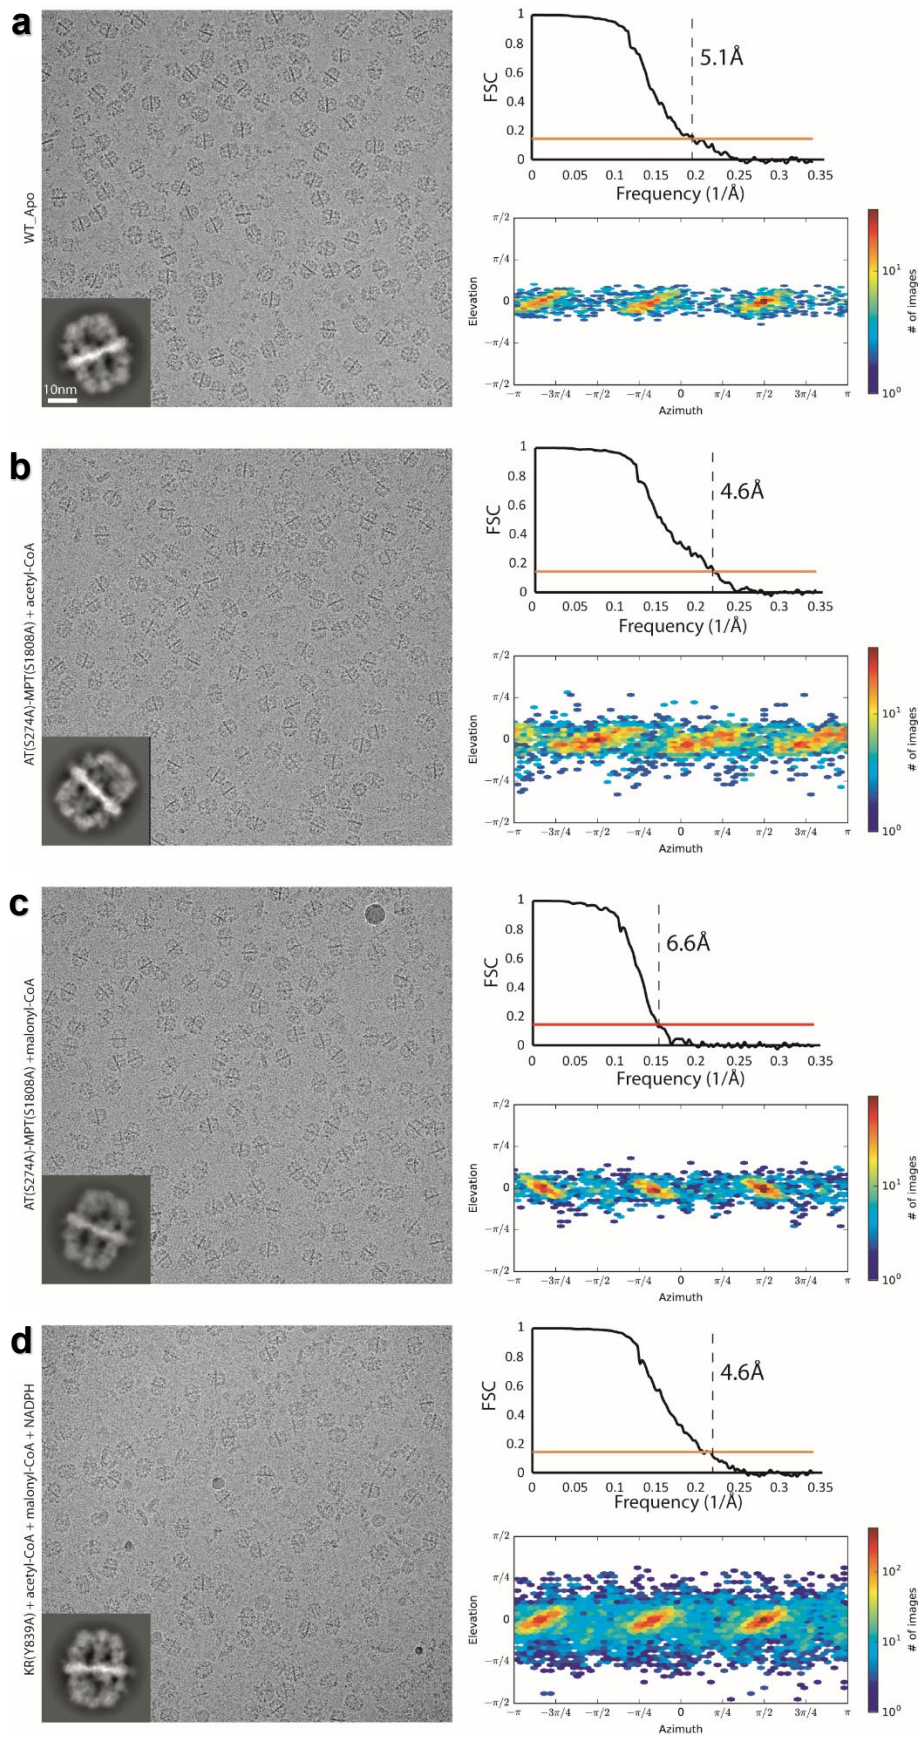

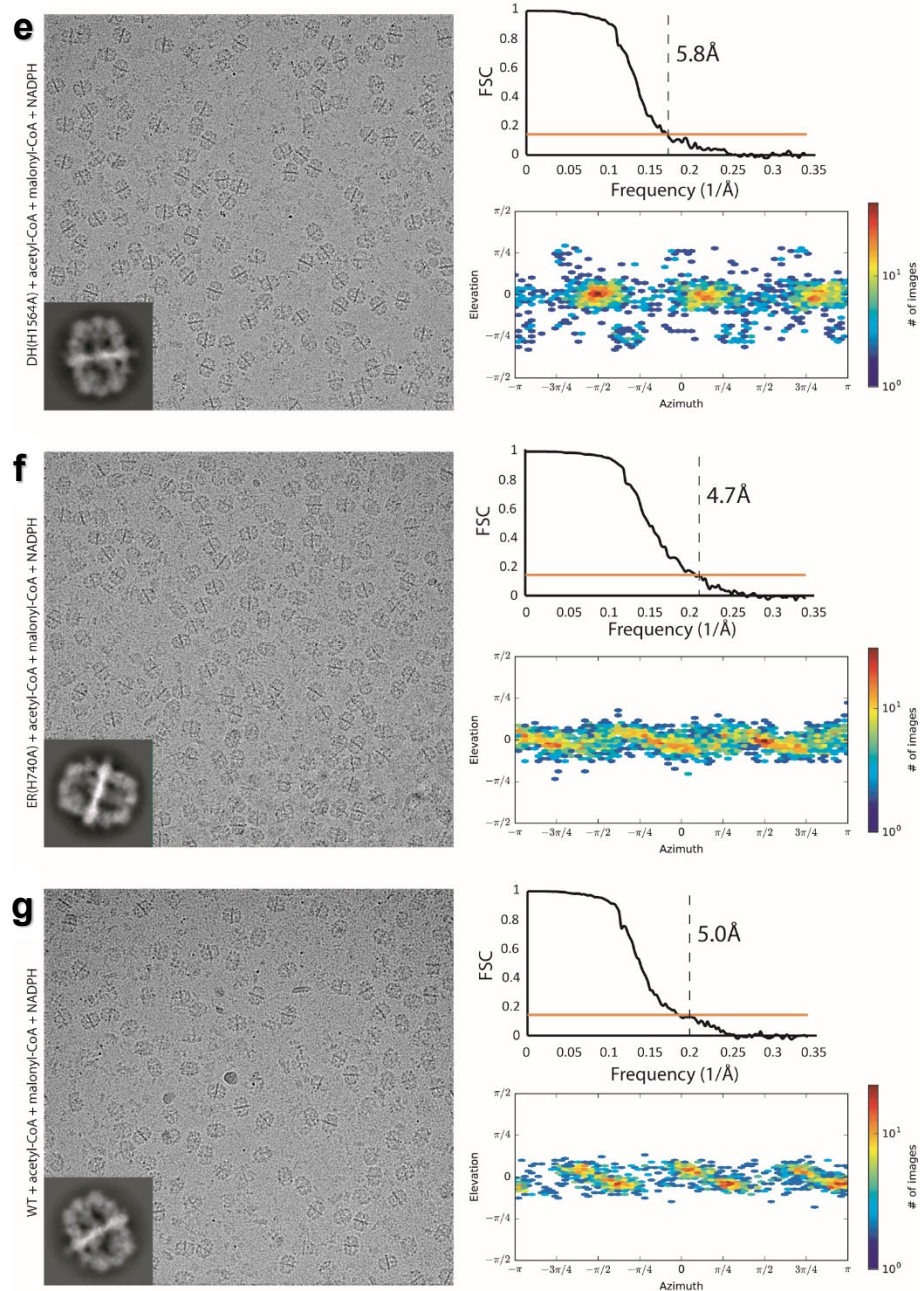

**Supplementary Figure 2. cryoEM analysis of purified FAS.** Representative electron micrographs for recombinant FAS WT and mutants in vitreous ice. Sample conditions are indicated to the left of each micrograph in **a-g**. To the right of each panel: mask corrected FSC curves (top, right) and orientation distributions of particle images (bottom, right). See table S2 for data collection and image processing details.



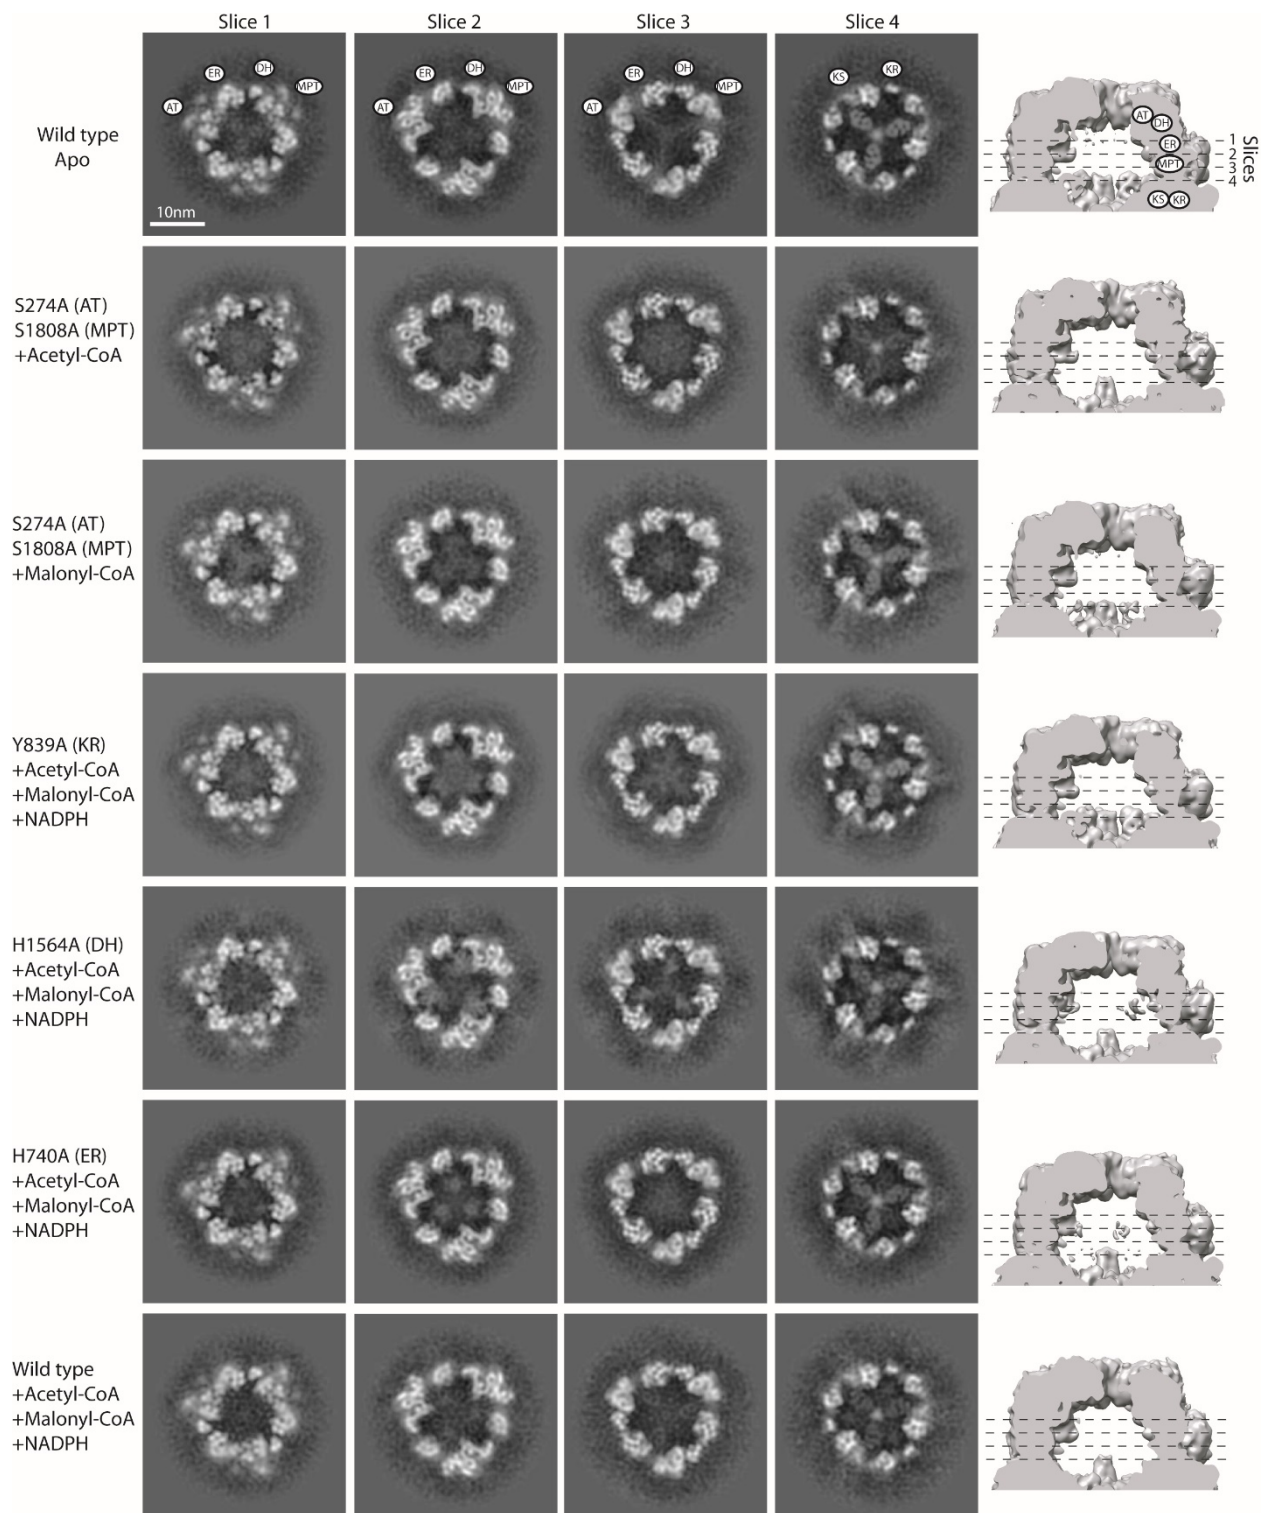

**Supplementary Figure 3. Cross-sections of cryoEM density maps reported in supplementary table 2.** All maps are D3 symmetric and low pass filtered to 7 Å for comparison. Slices shown using XIMDISP<sup>1</sup>. One chamber of each map is shown at the end of each row with the location of slices highlighted in the top row. Locations of catalytic centers are shown in the first row based on crystal structure of FAS (PDB: 2UV8<sup>2</sup>) as described in figure 2.

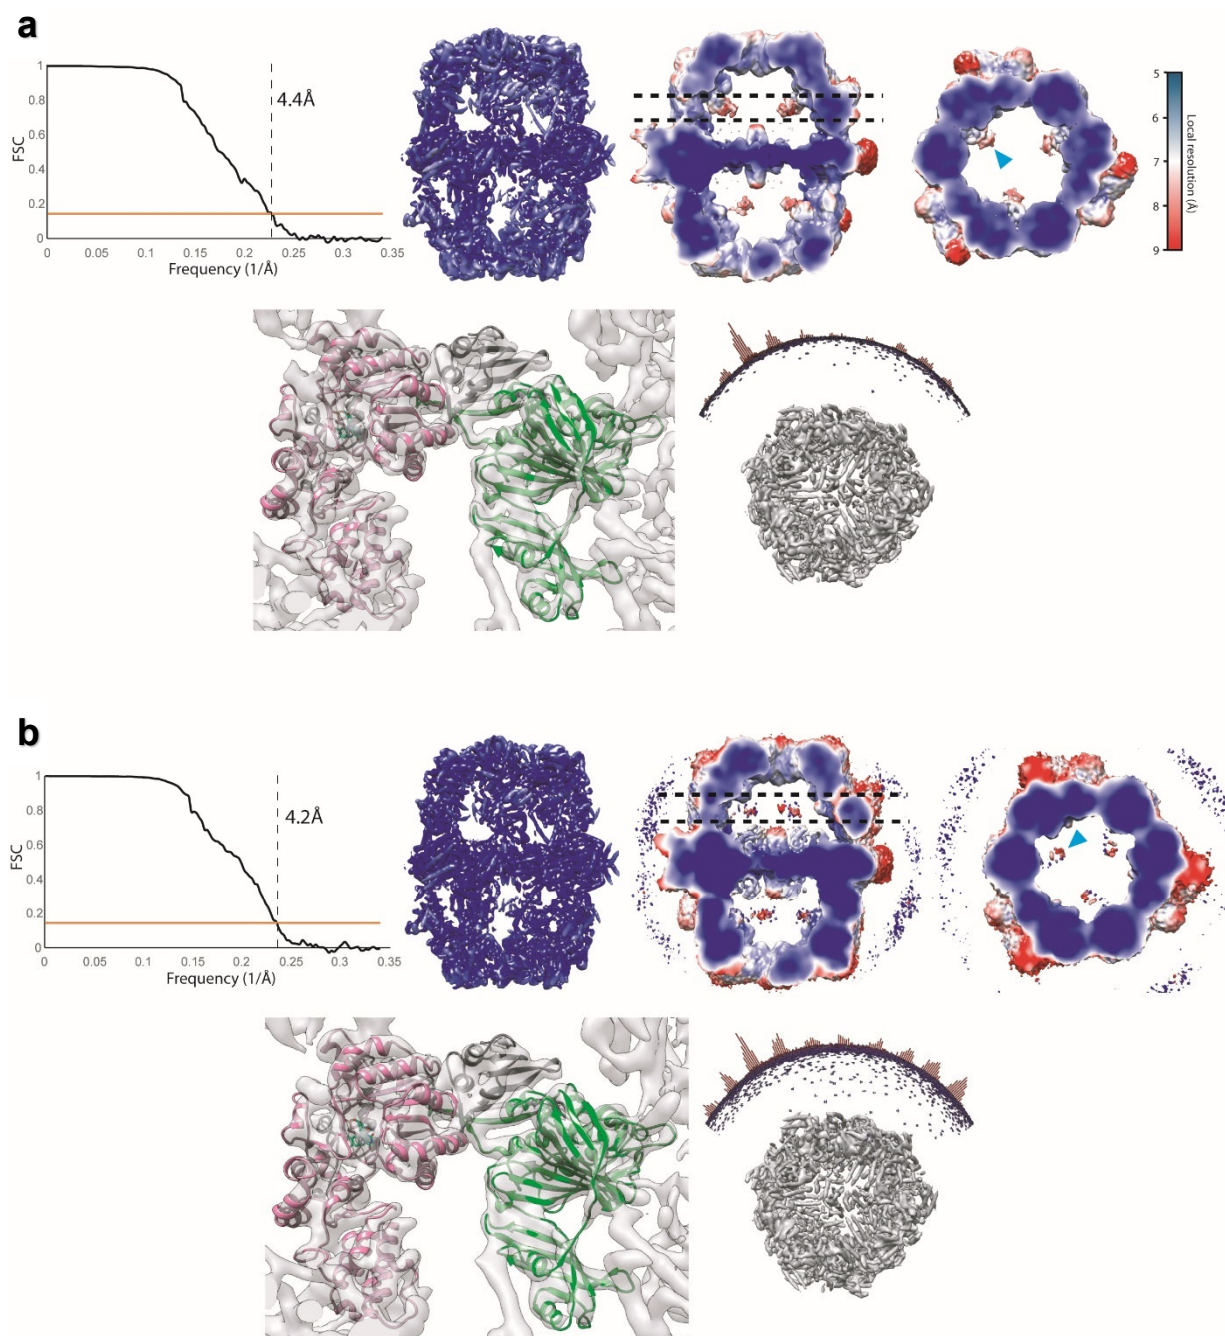

**Supplementary Figure 4. Quality of the cryoEM maps of DH and ER stalled states used in the focused classification and reported in table S3. Mask corrected FSC of the cryoEM map, local resolution estimate, particle orientation distribution, and example of model to map fit for a) DH- and b) ER-stalled datasets used in focused classification with Relion 3.0. Blue arrows indicate density corresponding to ACP domain.**

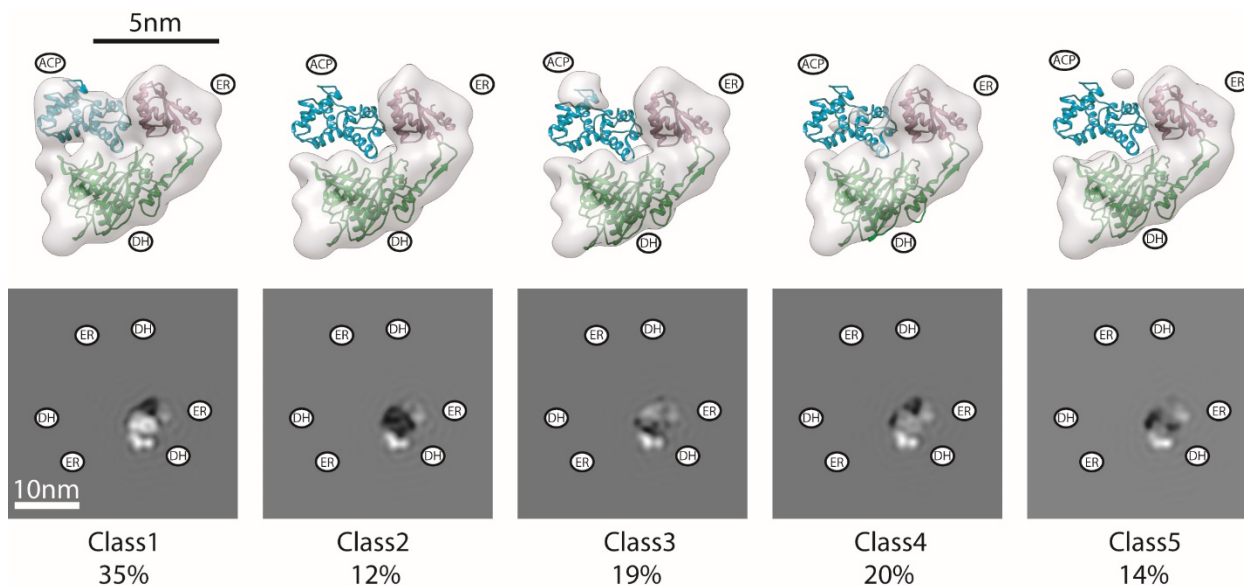

**Supplementary Figure 5. Focused 3D classes for the DH-stalled FAS.** cryoEM density map of each class is shown on the top with the slice through each of the classes shown at the bottom. The position of the slice is shown in figure 3. The percentage number of particles for each class is indicated below each slice. The maps are shown at identical threshold and maps and cross sections are low pass filtered to 10 Å for comparison.

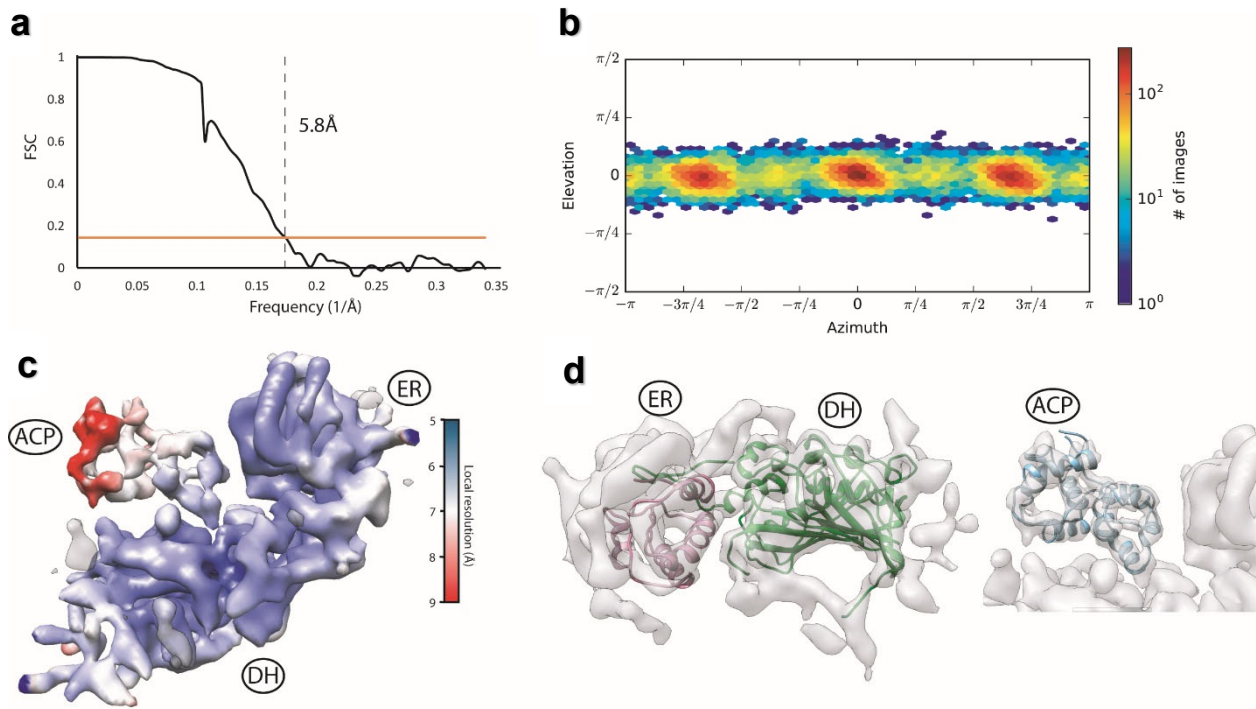

**Supplementary Figure 6. Quality of the focused refined map of DH stalled recombinant FAS. a)** Mask corrected FSC for the focused refinement of symmetry expanded and signal subtracted particle images for the DH-stalled state of FAS. **b)** Particle orientation distribution. **c)** local resolution estimate. **d)** Model to map fit for ACP and ER-DH fragments of the model.



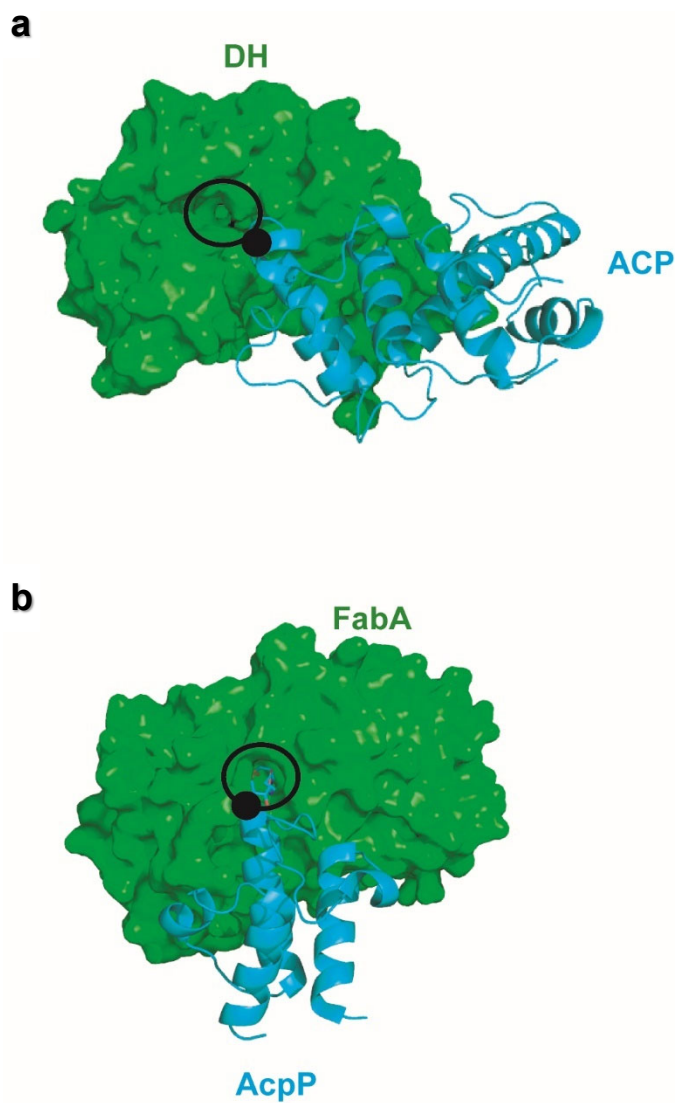

**Supplementary Figure 7. Fungal type I and bacterial type II FAS comparison for ACP interaction with dehydratase.** Comparison of a) ACP model in DH-stalled fungal type I FAS to b) AcpP cross-linked to the catalytic histidine of FabA in bacterial type II FAS (PDB: 4KEH<sup>3</sup>). Black circles and dots represent positions of the catalytic cavity of DH and the serine residue that is modified in cells by attachment of the phosphopantetheine arm, respectively.

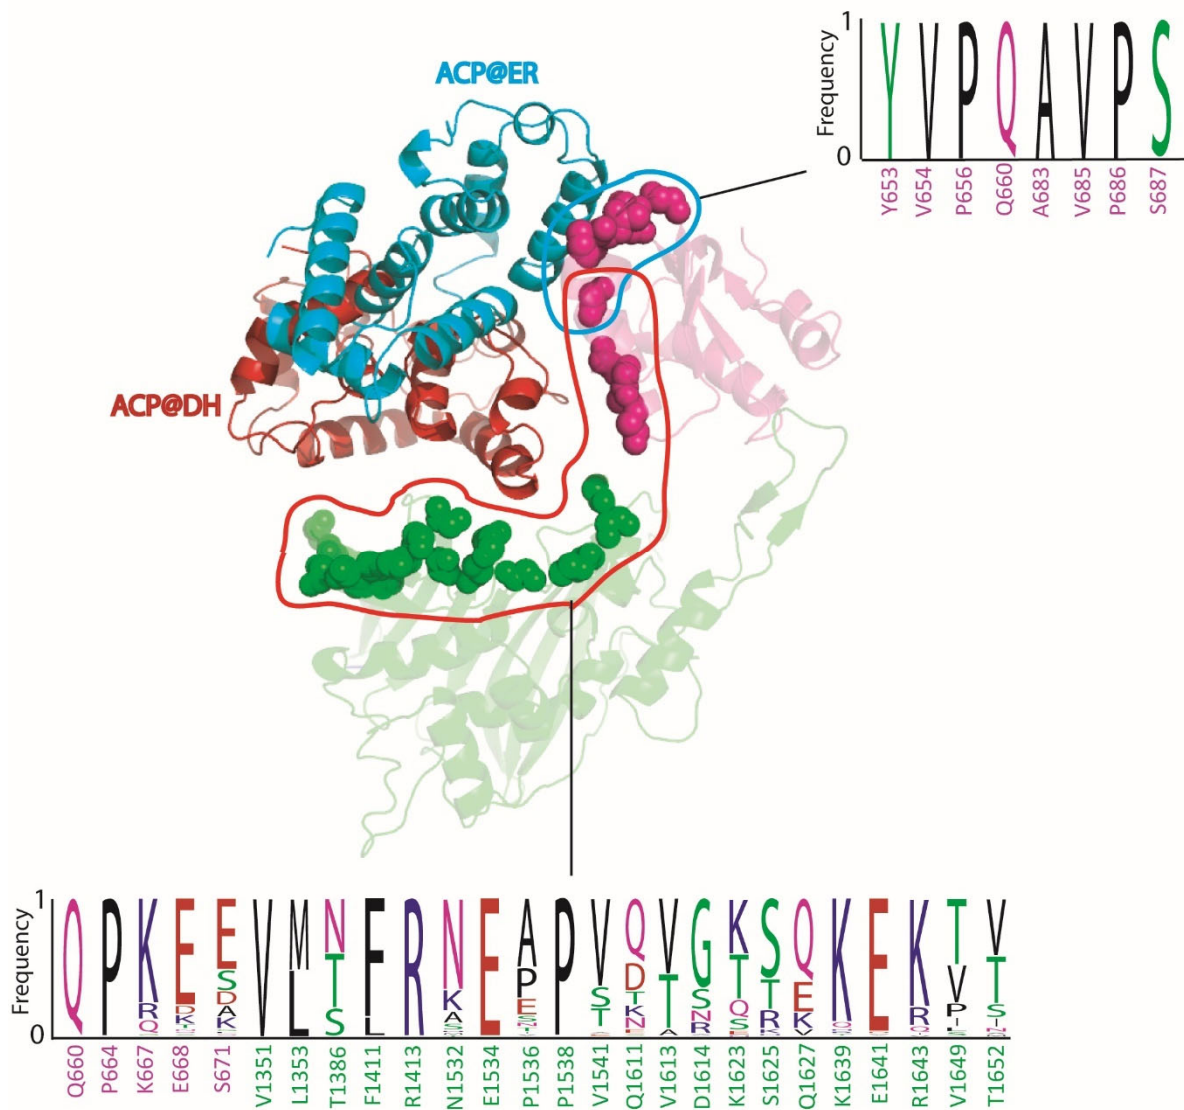

**Supplementary Figure 8. Conservation of residues lining the interface of ACP binding sites on ER and DH domains.** Model PDB: 2UV8. Backbone atoms of residues with solvent exposed sidechains are shown with spheres. ER and DH domains are shown as transparent cartoons with same color coding as figure 1. Residues belonging to each domain is colored respectively. ACP docked at ER and DH are shown with non-transparent cyan, and red cartoons respectively. Sequence alignment represented with Logo plot. Cyan and red enclosed solid lines highlights residues facing ACP docked at ER and DH domains, respectively.

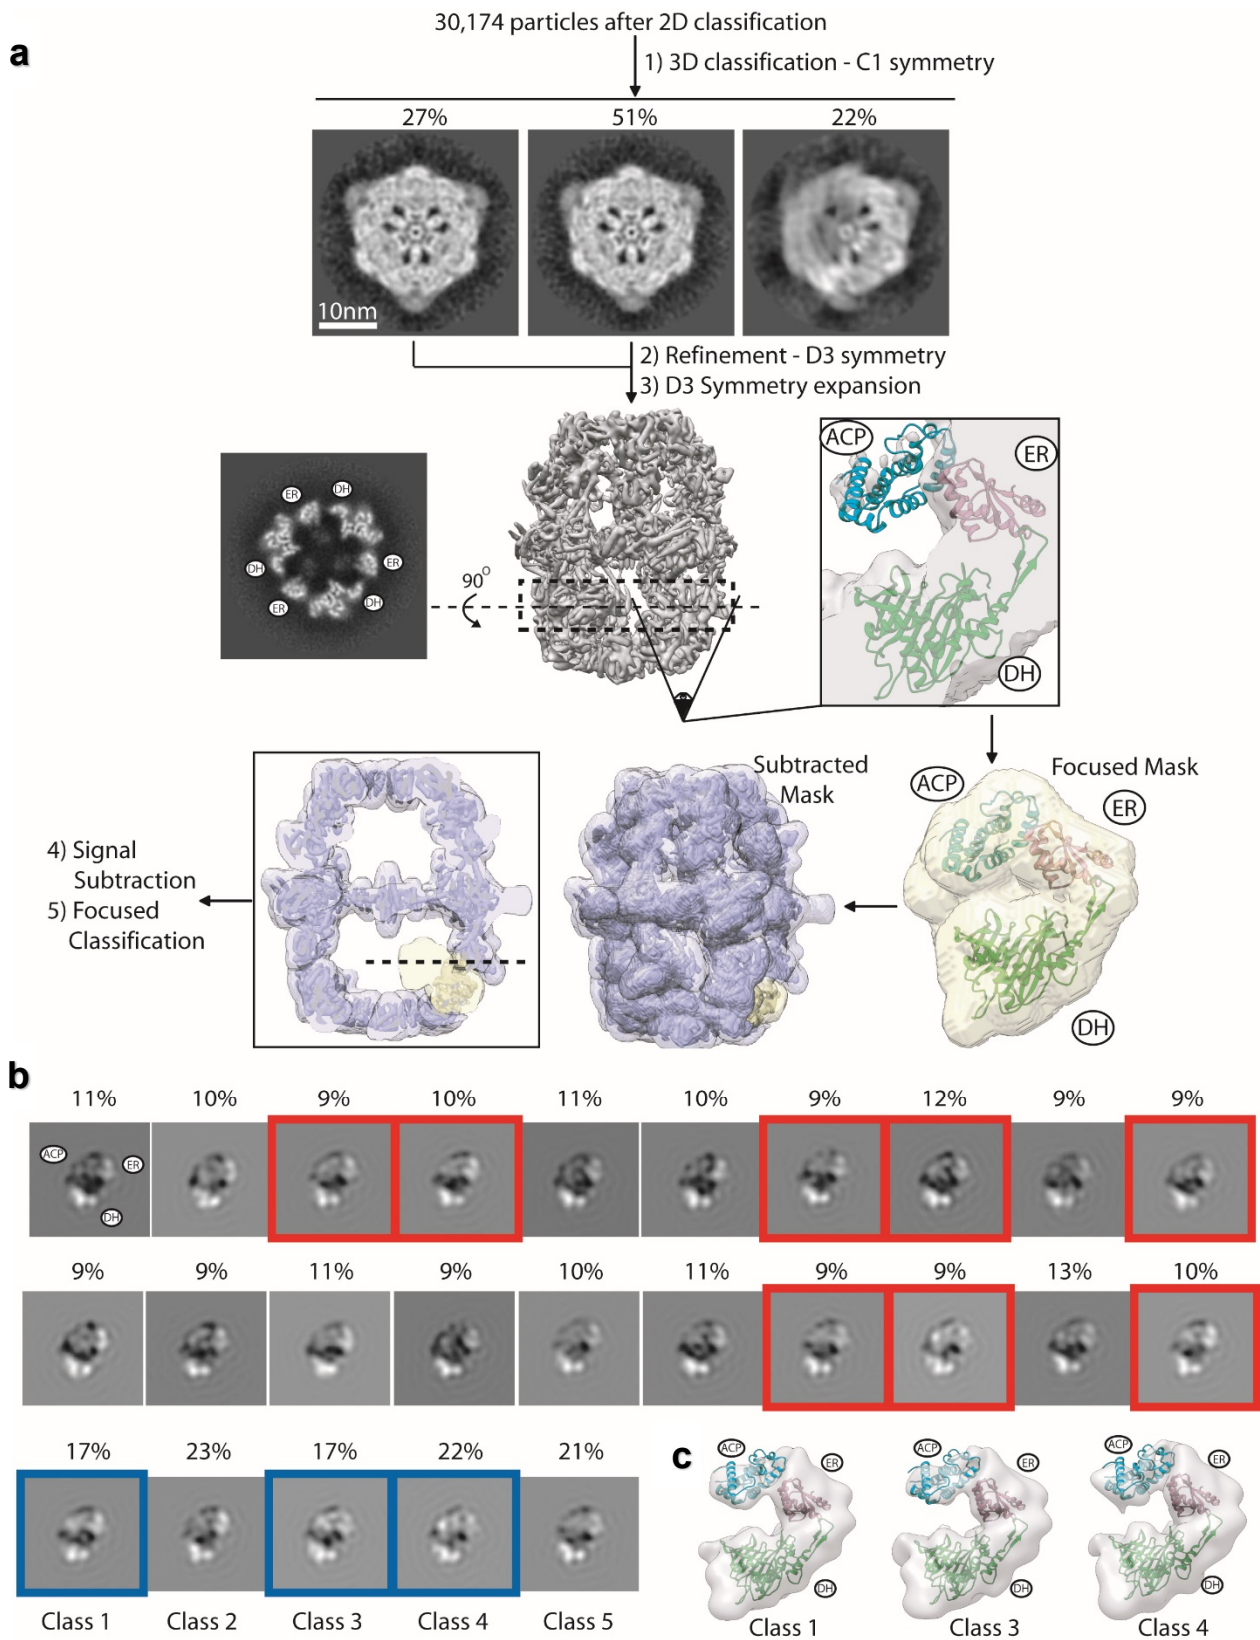

**Supplementary Figure 9. Focused classification of ACP in the ER stalled state of recombinant FAS. a)** Visual representation of the procedure is shown. **b)** Cross section of 3D classes shown (dashed line in lower left panel of A). Highlighted in red are classes chosen for the next round of 3D classification (represented in each row). Particle distribution are indicated above each 3D class as a percentage of total particles after 3D classification in panel A. The classes containing the ACP signal are highlighted in blue in the final round of 3D classification and **c)** shown as 3D cryoEM maps. Maps and cross sections in B) and C) are low passed filtered to 10 Å.



**Supplementary Table 1. Primers used in this study.** Primers used for cloning of FAS genes into bacterial expression vectors are with ‘NEB’ prefix. Primers for mutagenesis are with FAS domain abbreviation prefix. Custom primers used for sequencing are indicated with suffix ‘seq’.

| Primer name   | Sequence (5' -> 3')                                                   |
|---------------|-----------------------------------------------------------------------|
| NEB_fas2_F    | tgtgatgatgatgatgatggctgctgccCTATTTCTTAGTAGAAACGGC                     |
| NEB_fas2_R    | gtttaactttaagaaggagatatacATGAAGCCGGAAGTTGAG                           |
| NEB_fas1_F    | actttaagaaggagatataccATGGACGCTTACTCCACAAG                             |
| NEB_fas1_R    | ctgtgatgatgatgatgatggctgctccttagtggtgatgatggatgGGATTGTTCATACTTTTCCCAG |
| AT_S274A_F    | GTGCTACAGGTCACGCCCAAGTTTGGTTAC                                        |
| AT_S274A_R    | AACCACCACCGGCCAACTCAATGG                                              |
| ER_H740A_F    | GTGGTAGAGGTGGTGGTGCACATTCTTTCGAAGATG                                  |
| ER_H740A_R    | AGTTGTACAACAATGGCAAGCTGACGGG                                          |
| DH_H1564A_F   | GGTGATTTGAATCCAATTGCCGTTTACGTCATTTTG                                  |
| DH_H1564A_R   | CCCATTTGCTGTCCACCAGTCATGC                                             |
| MPT_S1808A_F  | CTACTTTTGTGGTACGCGTTAGGTGAGTATGCTG                                    |
| MPT_S1808A_R  | CCCATTTGCTGTCCACCAGTCATGC                                             |
| KR_Y839A_F    | GACAACCTGGATTCTGACGCCATACCATCACCACCG                                  |
| KR_Y839A_R    | TCCATTCGCGGCCATTCCAGAACA                                              |
| AT_S274_seq   | ACCCTTCAAATACCCAGACA                                                  |
| ER_H740_seq   | TGTCCCATCATTGGAAGTTGC                                                 |
| DH_H1564_seq  | TCACGGTAACCCTGTTGTTG                                                  |
| MPT_S1808_seq | GAGCACAGTACTTCTTACACA                                                 |
| KR_Y839_seq   | CTTAAGAATGATGGGTTGTGTC                                                |

**Supplementary Table 2. Data collection and image processing for cryoEM maps shown in figure 2 and supplementary figure 3.**

| <b>Data Collection</b>                    | <b>WT Apo</b>                     | <b>WT + acetyl-CoA + malonyl-CoA + NADPH</b> | <b>KR(Y839A) + acetyl-CoA + malonyl-CoA + NADPH</b> | <b>AT(S274A)-MPT(S1808A) + malonyl-CoA</b> | <b>DH(H1564A) + acetyl-CoA + malonyl-CoA + NADPH</b> | <b>ER(H740A) + acetyl-CoA + malonyl-CoA + NADPH</b> | <b>AT(S274A)-MPT(S1808A) + acetyl-CoA</b> |
|-------------------------------------------|-----------------------------------|----------------------------------------------|-----------------------------------------------------|--------------------------------------------|------------------------------------------------------|-----------------------------------------------------|-------------------------------------------|
| Microscope                                | FEI Tecnai F20                    | FEI Tecnai F20                               | FEI Tecnai F20                                      | FEI Tecnai F20                             | FEI Tecnai F20                                       | FEI Tecnai F20                                      | FEI Tecnai F20                            |
| Camera                                    | Gatan K2                          | Gatan K2                                     | Gatan K2                                            | Gatan K2                                   | Gatan K2                                             | Gatan K2                                            | Gatan K2                                  |
| Voltage                                   | 200 kV                            | 200 kV                                       | 200 kV                                              | 200 kV                                     | 200 kV                                               | 200 kV                                              | 200 kV                                    |
| Magnification                             | 34,483x                           | 34,483x                                      | 34,483x                                             | 34,483x                                    | 34,483x                                              | 34,483x                                             | 34,483x                                   |
| Pixel size                                | 1.45 Å                            | 1.45 Å                                       | 1.45 Å                                              | 1.45 Å                                     | 1.45 Å                                               | 1.45 Å                                              | 1.45 Å                                    |
| Exposure                                  | 36 electrons/Å <sup>2</sup>       | 36 electrons/Å <sup>2</sup>                  | 36 electrons/Å <sup>2</sup>                         | 36 electrons/Å <sup>2</sup>                | 36 electrons/Å <sup>2</sup>                          | 36 electrons/Å <sup>2</sup>                         | 36 electrons/Å <sup>2</sup>               |
| Exposure rate                             | 1.25 Electron/Å <sup>2</sup> /Sec | 1.25 Electron/Å <sup>2</sup> /Sec            | 1.25 Electron/Å <sup>2</sup> /Sec                   | 1.25 Electron/Å <sup>2</sup> /Sec          | 1.25 Electron/Å <sup>2</sup> /Sec                    | 1.25 Electron/Å <sup>2</sup> /Sec                   | 1.25 Electron/Å <sup>2</sup> /Sec         |
| Number of Frames                          | 30                                | 30                                           | 30                                                  | 30                                         | 30                                                   | 30                                                  | 30                                        |
| Defocus Range                             | 1.0-3.5 µm                        | 1.0-3.5 µm                                   | 1.0-3.5 µm                                          | 1.0-3.5 µm                                 | 1.0-3.5 µm                                           | 1.0-3.5 µm                                          | 1.0-3.5 µm                                |
| <b>Image Processing</b>                   |                                   |                                              |                                                     |                                            |                                                      |                                                     |                                           |
| Frame motion correction                   | CryoSPARC V2                      | CryoSPARC V2                                 | CryoSPARC V2                                        | CryoSPARC V2                               | CryoSPARC V2                                         | CryoSPARC V2                                        | CryoSPARC V2                              |
| CTF estimation                            | CTFFIND4                          | CTFFIND4                                     | CTFFIND4                                            | CTFFIND4                                   | CTFFIND4                                             | CTFFIND4                                            | CTFFIND4                                  |
| CTF cutoff                                | 5.0 Å                             | 5.0 Å                                        | 5.0 Å                                               | 5.0 Å                                      | 5.0 Å                                                | 5.0 Å                                               | 5.0 Å                                     |
| Particle selection software               | cryoSPARC                         | cryoSPARC                                    | cryoSPARC                                           | cryoSPARC                                  | cryoSPARC                                            | cryoSPARC                                           | cryoSPARC                                 |
| Micrographs Used                          | 47                                | 38                                           | 161                                                 | 43                                         | 38                                                   | 36                                                  | 47                                        |
| Particle image motion correction          | Alignpart_lmbfgs                  | Alignpart_lmbfgs                             | Alignpart_lmbfgs                                    | Alignpart_lmbfgs                           | Alignpart_lmbfgs                                     | Alignpart_lmbfgs                                    | Alignpart_lmbfgs                          |
| Total particles picked                    | 4,957                             | 4,159                                        | 28,411                                              | 8,415                                      | 6,052                                                | 8,596                                               | 7,409                                     |
| Particle images contributing to final map | 3,487                             | 2,664                                        | 19,804                                              | 5,073                                      | 3,590                                                | 3,771                                               | 5,739                                     |
| Reconstruction Software                   | CryoSPARC V2                      | CryoSPARC V2                                 | CryoSPARC V2                                        | CryoSPARC V2                               | CryoSPARC V2                                         | CryoSPARC V2                                        | CryoSPARC V2                              |
| Symmetry Applied                          | D3                                | D3                                           | D3                                                  | D3                                         | D3                                                   | D3                                                  | D3                                        |
| B-factor for sharpening                   | -122.4                            | -97.3                                        | -125.7                                              | -338.5                                     | -203.7                                               | -98.8                                               | -81.3                                     |
| Resolution (FSC = 0.143)                  | 5.1 Å                             | 5.0 Å                                        | 4.6 Å                                               | 6.6 Å                                      | 5.8 Å                                                | 4.7 Å                                               | 4.6 Å                                     |

**Supplementary Table 3. Data collection and image processing for D3 refined maps shown in figure 3 and supplementary figure 9.**

| <b>Data Collection</b>                    | <b>DH(H1564A) + acetyl-CoA + malonyl-CoA + NADPH</b> | <b>ER(H740A) + acetyl-CoA + malonyl-CoA + NADPH</b> |
|-------------------------------------------|------------------------------------------------------|-----------------------------------------------------|
| Microscope                                | FEI Tecnai F20                                       | FEI Tecnai F20                                      |
| Camera                                    | Gatan K2                                             | Gatan K2                                            |
| Voltage                                   | 200 kV                                               | 200 kV                                              |
| Magnification                             | 34,483x                                              | 34,483x                                             |
| Pixel size                                | 1.45 Å                                               | 1.45 Å                                              |
| Exposure                                  | 36 electrons/Å <sup>2</sup>                          | 36 electrons/Å <sup>2</sup>                         |
| Exposure rate                             | 1.25 Electron/Å <sup>2</sup> /Sec                    | 1.25 Electron/Å <sup>2</sup> /Sec                   |
| Number of Frames                          | 30                                                   | 30                                                  |
| Defocus Range                             | 1.0-3.5 µm                                           | 1.0-3.5 µm                                          |
| <b>Image Processing</b>                   |                                                      |                                                     |
| Frame motion correction                   | MotionCor2                                           | MotionCor2                                          |
| CTF estimation                            | CTFFIND4                                             | CTFFIND4                                            |
| CTF cutoff                                | 5.0 Å                                                | 5.0 Å                                               |
| Particle selection software               | Relion 3.0                                           | Relion 3.0                                          |
| Micrographs Used                          | 329                                                  | 258                                                 |
| Total particles picked                    | 27,032                                               | 32,037                                              |
| Particle images Contributing to final map | 15,767                                               | 22,642                                              |
| Reconstruction Software                   | RELION-3                                             | RELION-3                                            |
| Symmetry Applied                          | D3                                                   | D3                                                  |
| B-factor for sharpening                   | -215.3                                               | -210.2                                              |
| Resolution (FSC = 0.143)                  | 4.4 Å                                                | 4.2 Å                                               |

### Supplementary references:

1. Smith, J. M. XIMDISP—A Visualization Tool to Aid Structure Determination from Electron Microscope Images. *J. Struct. Biol.* **125**, 223–228 (1999).
2. Leibundgut, M., Jenni, S., Frick, C. & Ban, N. Structural basis for substrate delivery by acyl carrier protein in the yeast fatty acid synthase. *Science* **316**, 288–90 (2007).
3. Nguyen, C. *et al.* Trapping the dynamic acyl carrier protein in fatty acid biosynthesis. *Nature* **505**, 427–31 (2014).
