# Supplementary material for: Steric occlusion regulates proximal interactions of acyl carrier protein domain in fungal fatty acid synthase
Source: PubMed Central journal article supplement (PMC7260205; doi:10.1038/s42003-020-0997-y), 2020-05-29
Supplement: 42003_2020_997_MOESM2_ESM.pdf [file 42003_2020_997_MOESM2_ESM.pdf]

## **Description of Additional Supplementary Files**

File Name: Supplementary Data 1

Description: Whole plasmid sequencing results for FAS1 and FAS2 genes clone from *S. cerevisiae* genomic DNA into bacterial expression vectors.

File Name: Supplementary Data 2

Description: Sequences of fungal species used in multi-sequence alignment. Sequences are presented in FASTA format.

File Name: Supplementary Data 3

Description: Source data for Figure 1d
